# Supplementary material
Source: PubMed Central journal article supplement (PMC6792371)
Supplement: ehp-127-099001-s003.pdf [file ehp-127-099001-s003.pdf]

**Note to readers with disabilities:** *EHP* strives to ensure that all journal content is accessible to all readers. However, some figures and Supplemental Material published in *EHP* articles may not conform to [508 standards](#) due to the complexity of the information being presented. If you need assistance accessing journal content, please contact [ehp508@niehs.nih.gov](mailto:ehp508@niehs.nih.gov). Our staff will work with you to assess and meet your accessibility needs within 3 working days.

### **Supplemental Material**

#### **Erratum: “Low-Level Environmental Lead Exposure and Children’s Intellectual Function: An International Pooled Analysis”**

Bruce P. Lanphear, Richard Hornung, Jane Khoury, Kimberly Yolton, Peter Baghurst, David C. Bellinger, Richard L. Canfield, Kim N. Dietrich, Robert Bornschein, Tom Greene, Stephen J. Rothenberg, Herbert L. Needleman, Lourdes Schnaas, Gail Wasserman, Joseph Graziano, and Russell Roberts

#### **Table of Contents**

Corrected Manuscript with Changes Marked.

Revised Images.

Original Published Manuscript with Changed Areas Highlighted.
